# Supplementary material for: The Risk of Synoptic-Scale Arctic Cyclones to Shipping
Source: Copernicus journal article supplement (doi:10.5194/egusphere-2023-2222), 2023-11-09
Supplement: Supplementary file 1 [file egusphere-2023-2222-supplement.pdf]

# Supplementary Material: The Risk of Synoptic-Scale Arctic Cyclones to Shipping

Alexander F. Vessey<sup>1,2</sup>, Kevin I. Hodges<sup>2,3</sup>, Len C. Shaffrey<sup>2,3</sup>, and Jonathan J. Day<sup>3</sup>

<sup>1</sup>AXA XL, 20 Gracechurch Street, London, UK, EC3V 0BG

<sup>2</sup>Department of Meteorology, University of Reading, Earley Gate, Reading RG6 6BB, UK

<sup>3</sup>National Centre for Atmospheric Science, University of Reading, Earley Gate, Reading RG6 6BB, UK

<sup>4</sup>ECMWF, Shinfield Park, Reading RG2 9AX, UK

**Correspondence:** Alexander F. Vessey (alecvessey@hotmail.co.uk)

**Table S1.** Distances between major ports in Europe and North America to major ports in Asia when using Arctic routes, or mid-latitude routes (the Suez Canal Route between Europe and Asia, and the Panama Canal Route between North America and Asia). The distances have been calculated on Google Earth (Google, 2021), and are given to the nearest hundred nautical miles (nm).

| <b>Departure Port</b>   | <b>Destination Port</b> | <b>Distance Using Mid-Latitude Route</b> | <b>Distance Using Arctic Route (1979-2020 mean Sept. Arctic Sea Ice extent)</b> | <b>Arctic Minus Mid-Latitude Route (1979- 2020 Sept. Arctic Sea Ice extent)</b> |
|-------------------------|-------------------------|------------------------------------------|---------------------------------------------------------------------------------|---------------------------------------------------------------------------------|
| Rotterdam               | Tokyo                   | 11,300 nm                                | 7,000 nm                                                                        | <b>-4,300 nm</b>                                                                |
| Rotterdam               | Shanghai                | 10,500 nm                                | 7,900 nm                                                                        | <b>-2,600 nm</b>                                                                |
| New York and New Jersey | Tokyo                   | 9,700 nm                                 | 7,400 nm                                                                        | <b>-2,300 nm</b>                                                                |
| New York and New Jersey | Shanghai                | 10,700 nm                                | 8,300 nm                                                                        | <b>-2,400 nm</b>                                                                |

**Table S2.** Time, vessel name, type of incident and whether the vessel was damaged or lost of shipping accidents following the intersection of a ship track within a radius of 3° of the location of Arctic cyclones' maximum 10 metre wind speeds greater than 17 ms<sup>-1</sup>. Shipping incident data from PAME (2023).

| <b>Time of Incident (YYYY/MM/DD)</b> | <b>Vessel Name</b> | <b>Type of Incident</b>  | <b>Vessel Lost or Damaged</b> | <b>Vessel Tonnage</b> | <b>Consequences</b> |
|--------------------------------------|--------------------|--------------------------|-------------------------------|-----------------------|---------------------|
| 2011/07/04                           | Arctic Hawk        | Fire                     | Damaged                       | 17                    | Marine Casualty     |
| 2011/07/22                           | Barge 210          | Allision                 | Damaged                       | 1255                  | Marine Casualty     |
| 2011/09/11                           | Barge 211          | Equipment failure        | Damaged                       | 1016                  | Marine Casualty     |
| 2013/07/28                           | Tony Saganna       | Set Adrift               | Damaged                       | 40                    | Marine Casualty     |
| 2013/10/12                           | Beauty Bay         | Fire                     | Damaged                       | 196                   | Marine Casualty     |
| 2013/11/15                           | AP 1-88-8701       | Equipment failure        | Damaged                       | 18                    | Marine Casualty     |
| 2015/08/22                           | Capt Frank Moody   | Collision                | Damaged                       | 166                   | Marine Casualty     |
| 2016/01/02                           | Arctic Hawk        | Loss of electrical power | Damaged                       | 17                    | Marine Casualty     |

Table S3: Time, vessel name, type of incident and whether the vessel was damaged or lost of shipping accidents following the intersection of a ship track within a radius of 3° of the location of Arctic cyclones' maximum maximum significant wave heights are greater than 2.5 m. Shipping incident data from PAME (2023).

| <b>Time of Incident<br/>(YYYY/MM/DD)</b> | <b>Vessel Name</b> | <b>Type of Incident</b> | <b>Vessel Lost<br/>or Damaged</b> | <b>Vessel<br/>Tonnage</b> | <b>Consequences</b> |
|------------------------------------------|--------------------|-------------------------|-----------------------------------|---------------------------|---------------------|
| 2011/07/04                               | Arctic Hawk        | Fire                    | Damaged                           | 17                        | Marine Casualty     |
| 2011/07/23                               | Barge 210          | Allision                | Damaged                           | 1255                      | Marine Casualty     |
| 2013/07/28                               | Tony Saganna       | Set Adrift              | Damaged                           | 40                        | Marine Casualty     |
| 2013/10/12                               | Beauty Bay         | Fire                    | Damaged                           | 196                       | Marine Casualty     |
| 2015/08/22                               | Capt Frank Moody   | Collision               | Damaged                           | 166                       | Marine Casualty     |

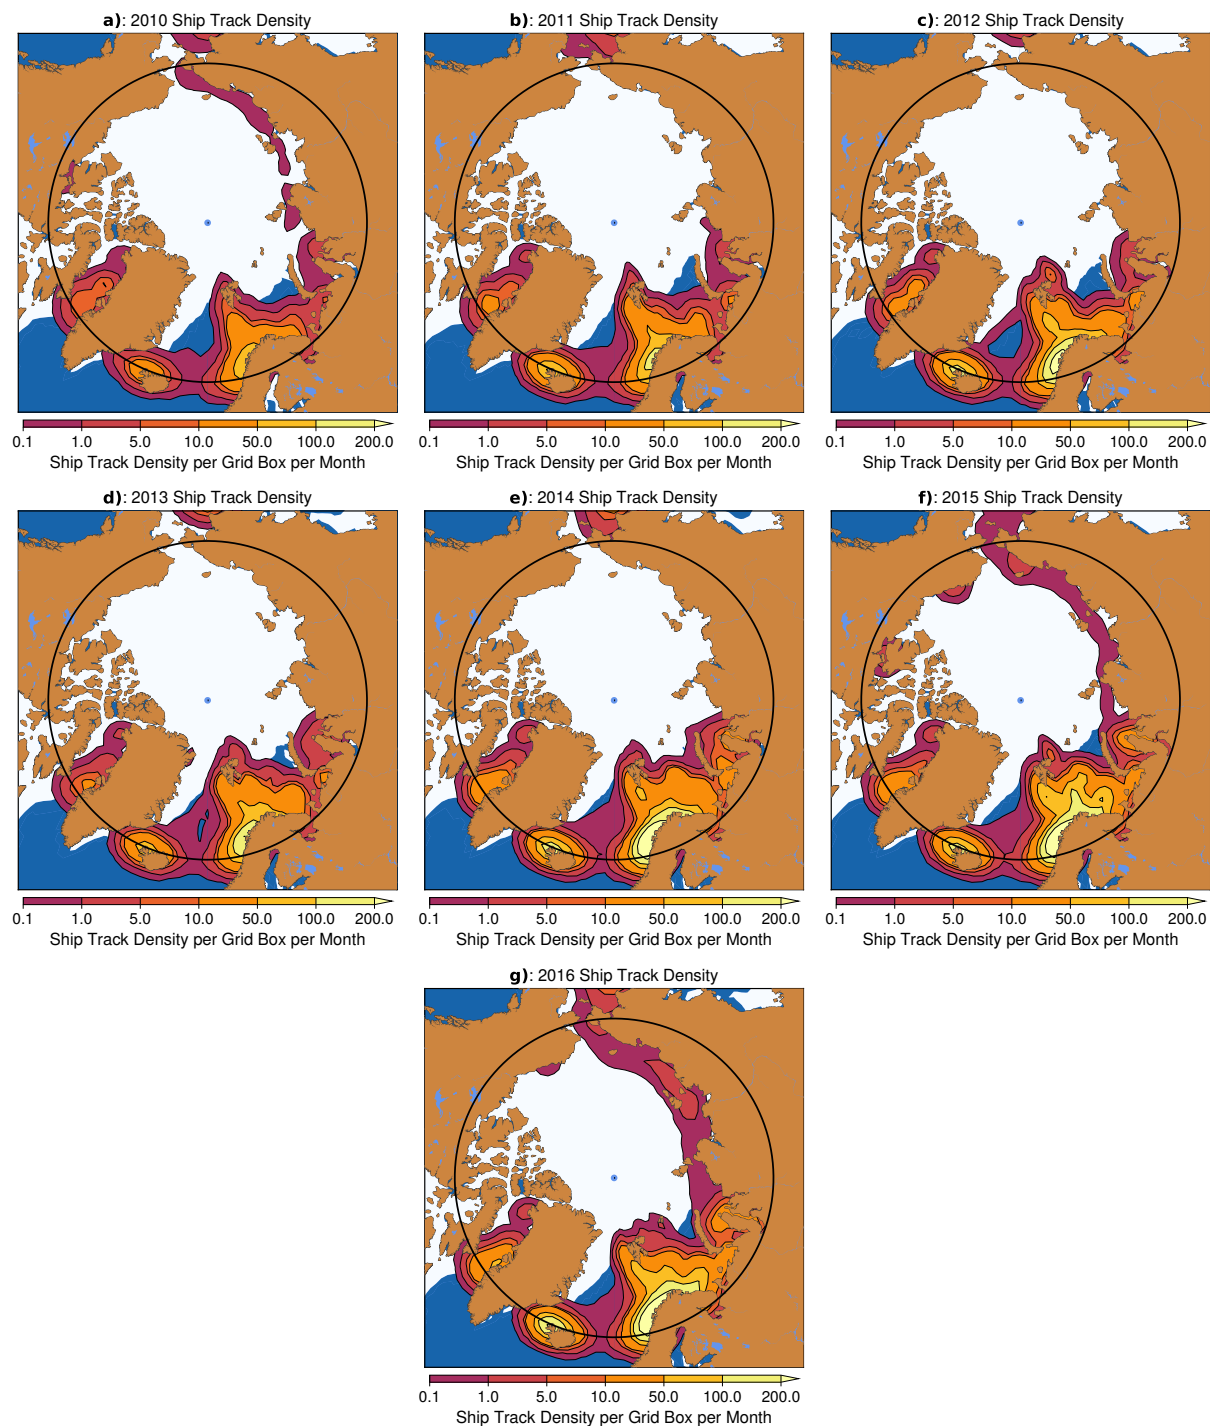

**Figure S4.** Ship track density per year from 2010 to 2016 from the Berkman et al. (2020) Arctic shipping dataset. **(a)** 2010, **(b)** 2011, **(c)** 2012, **(d)** 2013, **(e)** 2014, **(f)** 2015, **(g)** 2016. Mean HadISST Arctic sea ice concentration is also shown in white, where sea ice concentration is greater than 15%. The white line indicates the perimeter of Arctic sea ice extent. The solid black line indicates the Arctic Circle (66.3°N).

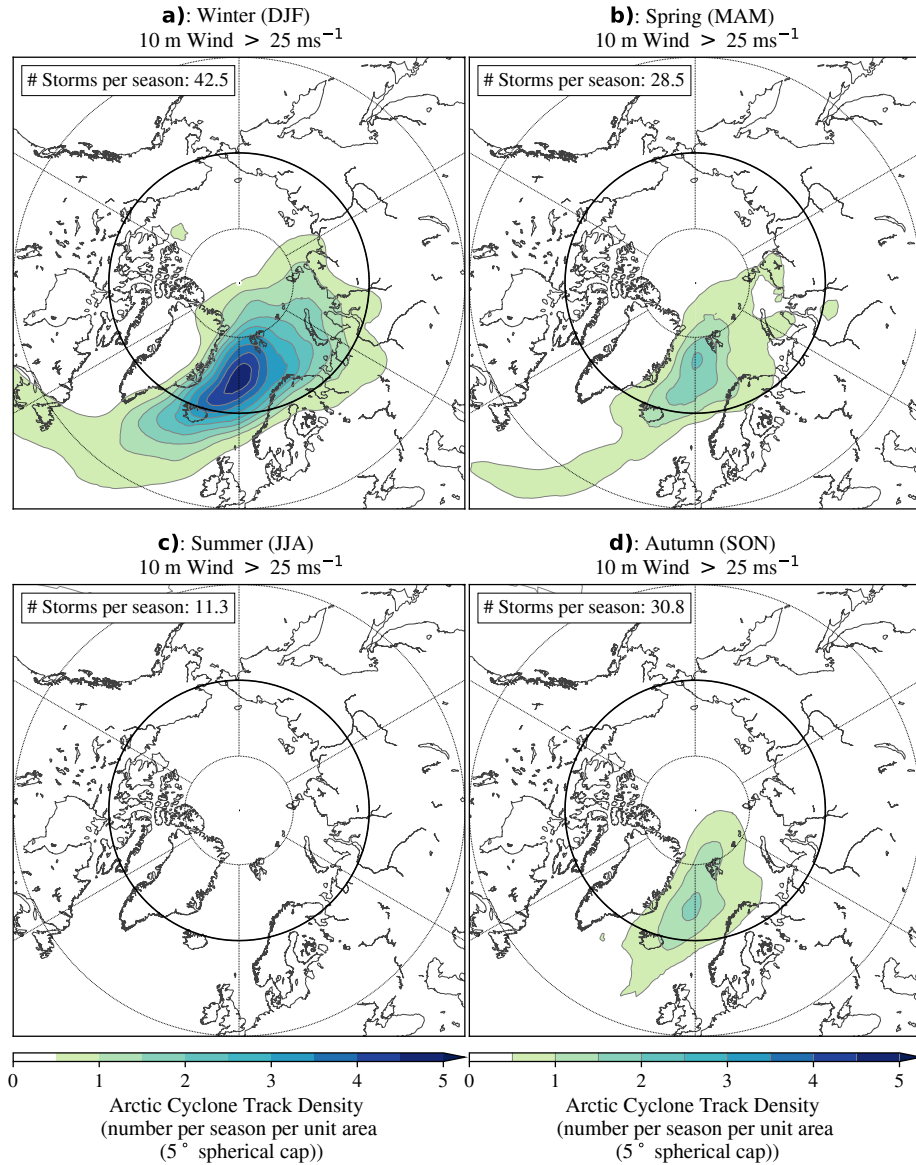

**Figure S5.** Track density per season of **a)** winter (DJF), **b)** spring (MAM), **c)** summer (JJA) and **d)** autumn (SON) cyclones that have maximum 10 metre (m) wind speeds in the Arctic ( $66.3^{\circ}\text{N}$ ) greater than  $25\text{ ms}^{-1}$ . Based on the ERA-5 reanalysis dataset between 1979-2021 in spring (MAM), summer (JJA) and autumn (SON), and 1979/80-2020/21 in winter (DJF). Track density indicates the number of cyclones that travel over a grid point and has units of number per season per unit area ( $5^{\circ}$  spherical cap, approximately  $10^6\text{ km}^2$ ). Longitudes are shown every  $60^{\circ}\text{E}$ , and latitudes are shown at  $80^{\circ}\text{N}$ ,  $66.3^{\circ}\text{N}$  (bold) and  $50^{\circ}\text{N}$ .

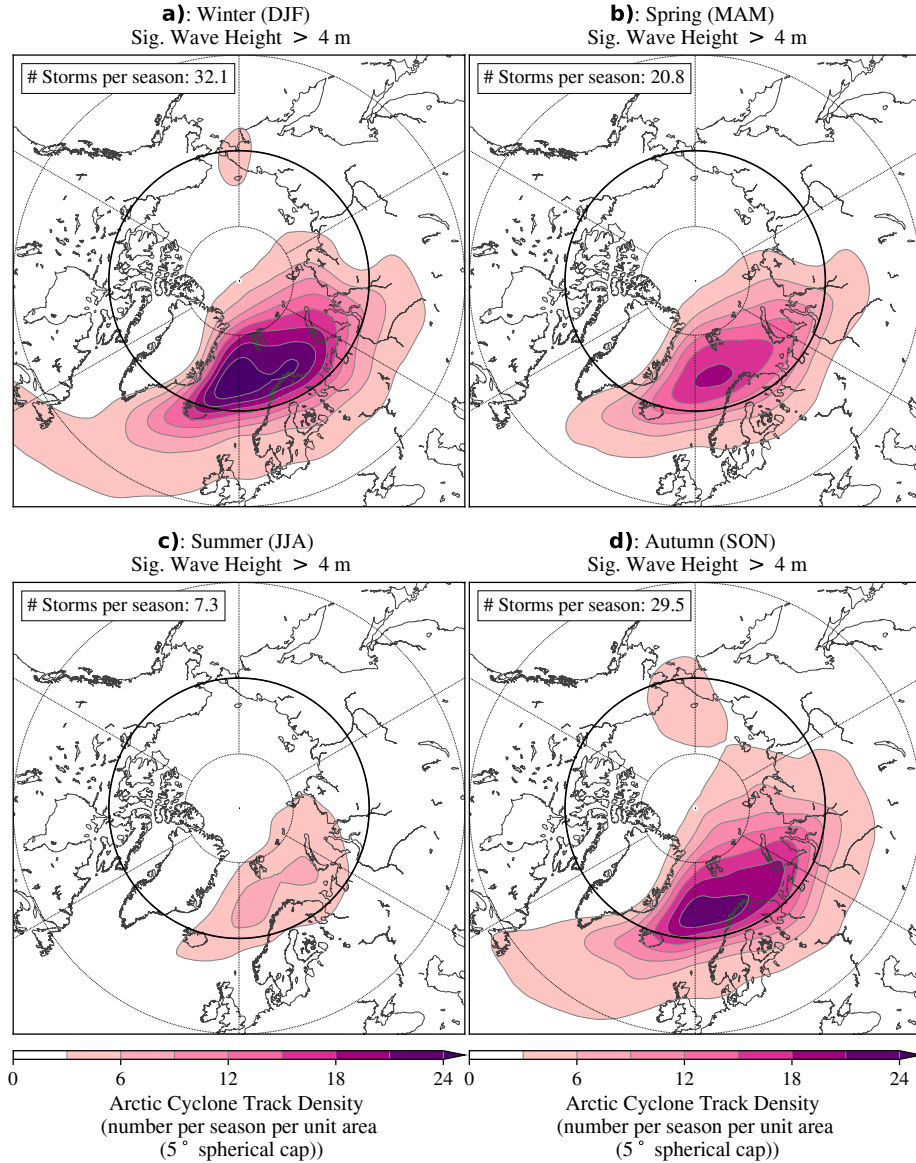

**Figure S6.** Track density per season of **a)** winter (DJF), **b)** spring (MAM), **c)** summer (JJA) and **d)** autumn (SON) cyclones that have maximum significant wave height including tide and swell in the Arctic ( $66.3^{\circ}\text{N}$ ) greater than 4 m. Based on the ERA-5 reanalysis dataset between 1979-2021 in spring (MAM), summer (JJA) and autumn (SON), and 1979/80-2020/21 in winter (DJF). Track density indicates the number of cyclones that travel over a grid point and has units of number per season per unit area ( $5^{\circ}$  spherical cap,  $\approx 10^6 \text{ km}^2$ ). Longitudes are shown every  $60^{\circ}\text{E}$ , and latitudes are shown at  $80^{\circ}\text{N}$ ,  $66.3^{\circ}\text{N}$  (bold) and  $50^{\circ}\text{N}$ .

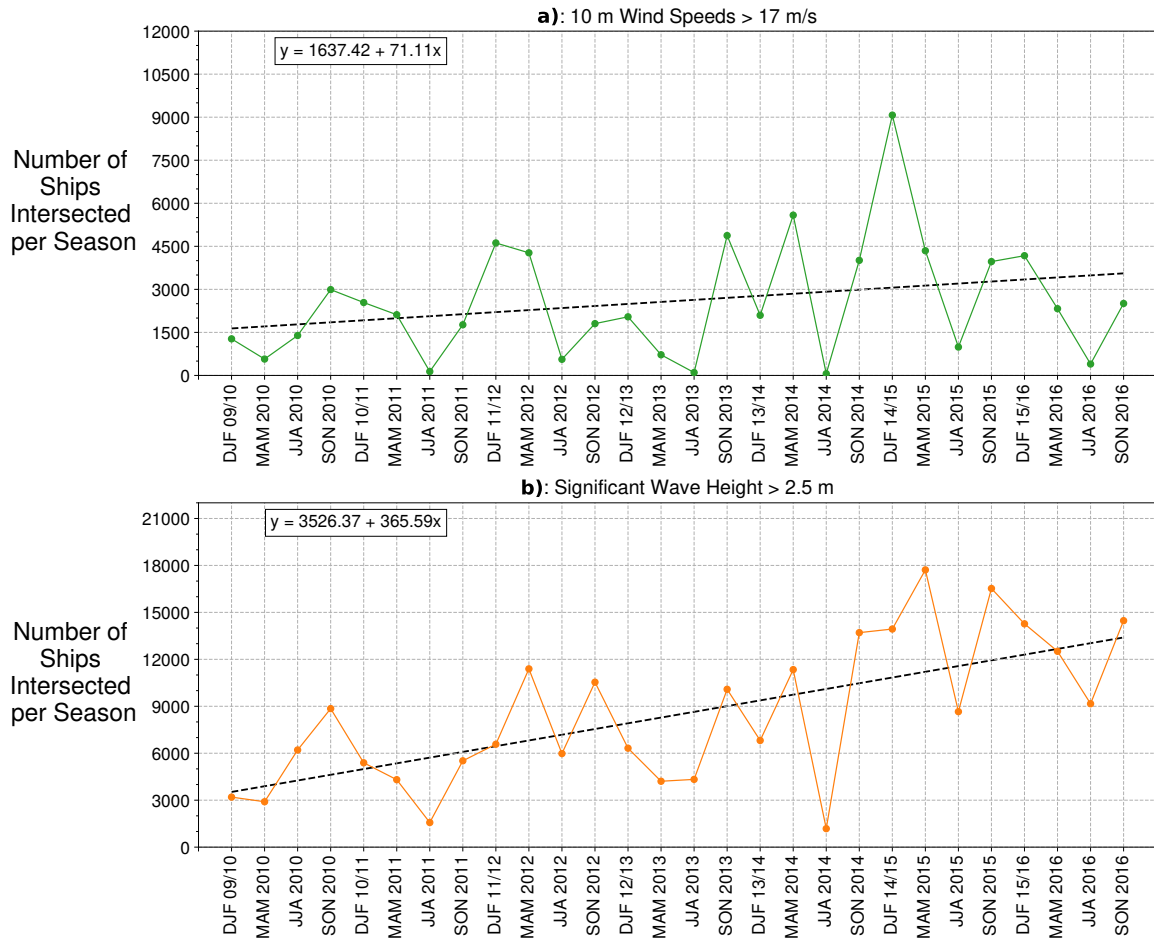

**Figure S7.** The seasonal (winter - DJF, spring - MAM, summer - JJA and autumn - SON) number of intersections between ship tracks within a radius of  $3^\circ$  of the location of Arctic cyclones' maximum **a)** 10 metre wind speeds which are greater than  $17 \text{ ms}^{-1}$  and **b)** 10 metre wind speeds which are greater than  $17 \text{ ms}^{-1}$  significant wave height (including tide and swell) greater than 2.5 m in the Arctic, from December 2009 to December 2016.

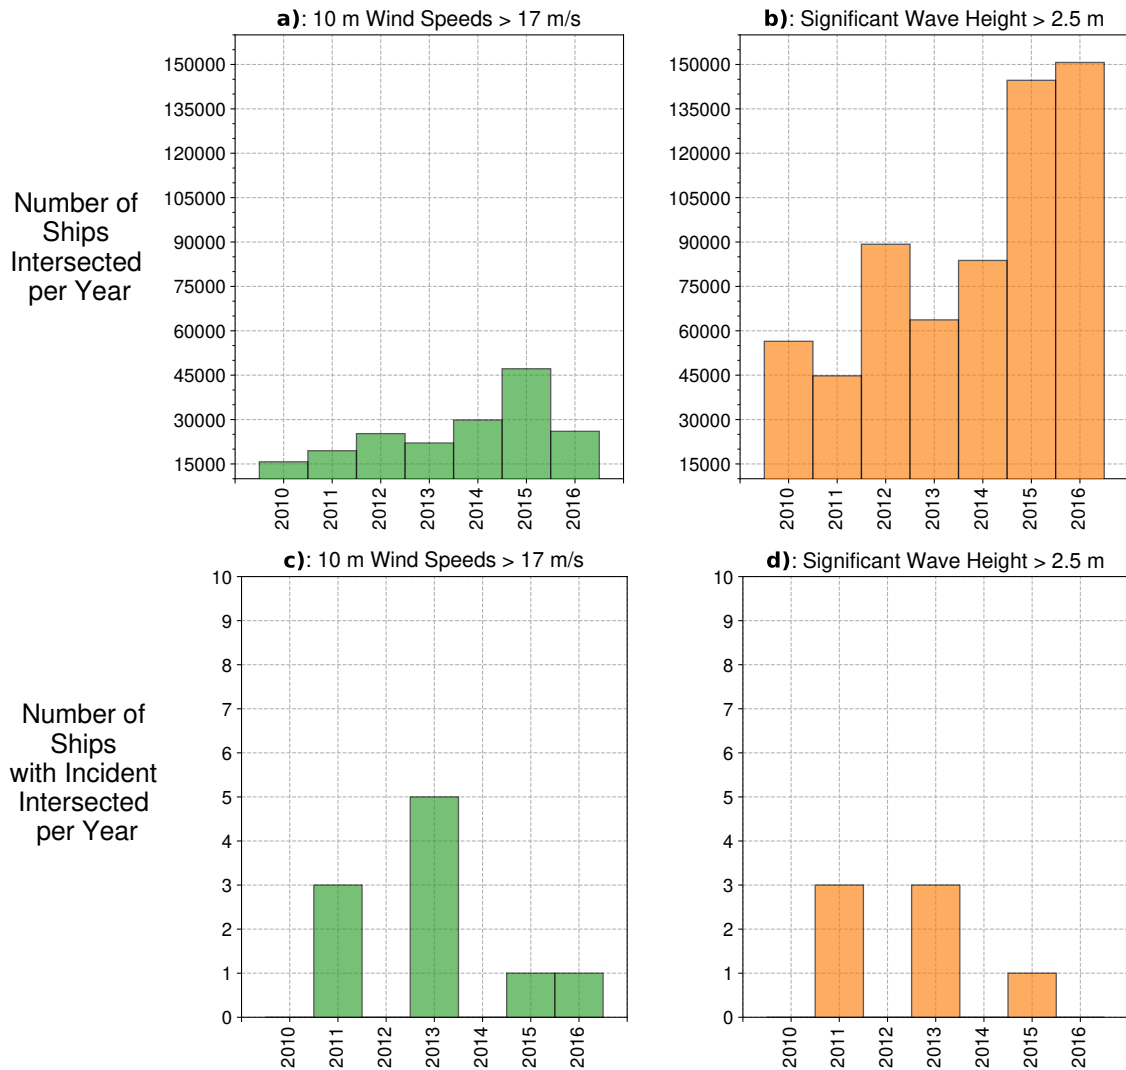

**Figure S8.** The annual number of intersections between ship tracks north of the Arctic Circle ( $66.3^{\circ}\text{N}$ ) within a  $5^{\circ}$  radius of an Arctic cyclones' (any cyclone to travel north of  $66.3^{\circ}\text{N}$ ) maximum **a)** 10 metre wind speeds greater than  $17\text{ ms}^{-1}$  and **b)** significant wave height including tide and swell greater than 2.5 m, between January 2010 and December 2016. **c)** and **d)** show the number of shipping incidents north of the Arctic Circle ( $66.3^{\circ}\text{N}$ ) that were reported within 48 hours of a ship track and cyclone intersection.



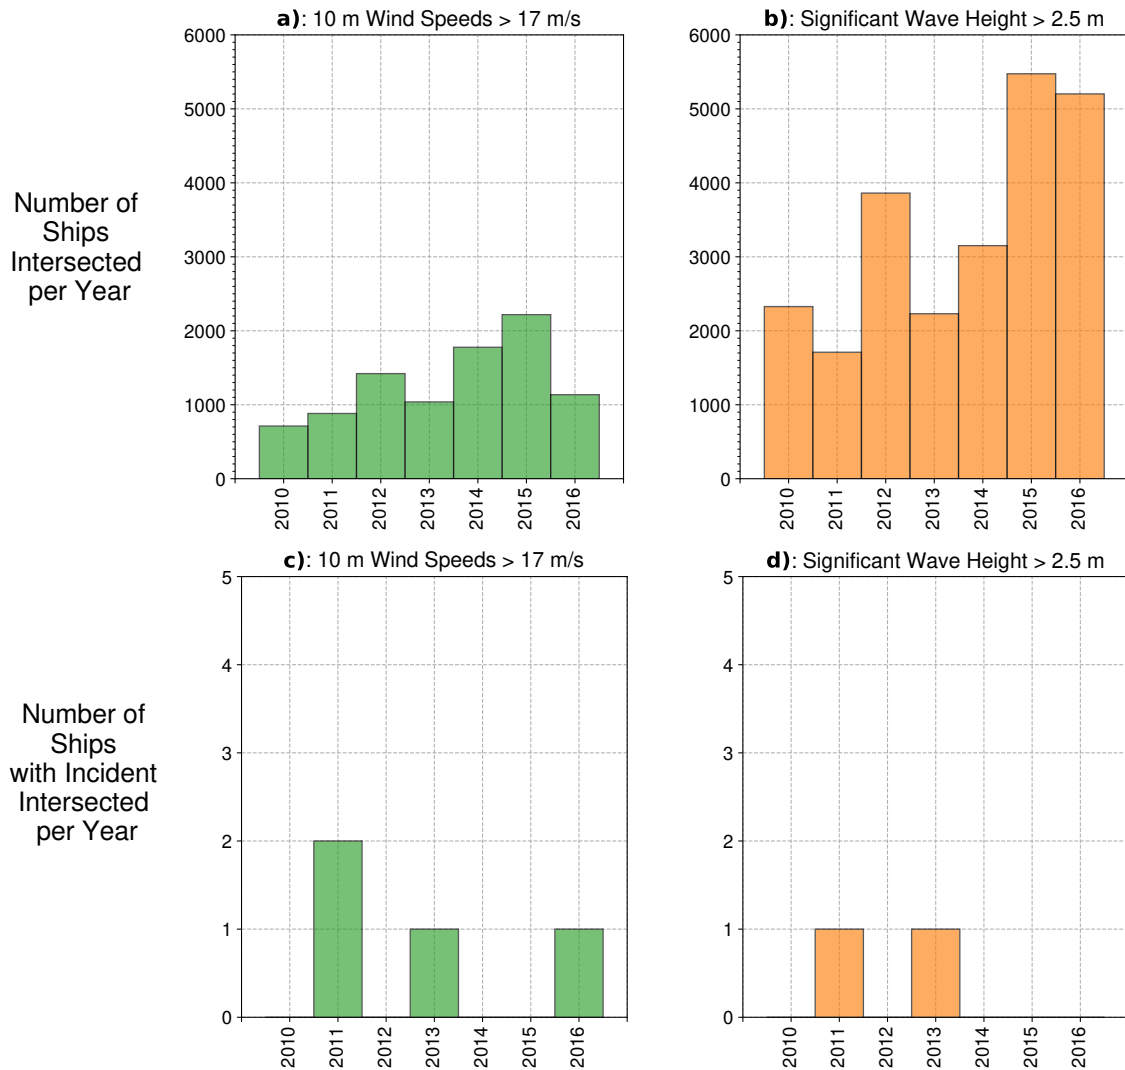

**Figure S9.** The annual number of intersections between ship tracks north of the Arctic Circle ( $66.3^{\circ}\text{N}$ ) within a  $1^{\circ}$  radius of an Arctic cyclones' (any cyclone to travel north of  $66.3^{\circ}\text{N}$ ) maximum **a)** 10 metre wind speeds greater than  $17\text{ ms}^{-1}$  and **b)** significant wave height including tide and swell greater than 2.5 m, between January 2010 and December 2016. **c)** and **d)** show the number of shipping incidents north of the Arctic Circle ( $66.3^{\circ}\text{N}$ ) that were reported within 48 hours of a ship track and cyclone intersection.

## References

- Berkman, P., Fiske, G., and Lorenzini, D.: Baseline of next-generation Arctic Marine Shipping Assessments—Oldest continuous Pan-Arctic Satellite Automatic Identification System (AIS) data record of maritime ship traffic, 2009–2016, Arctic Data Center. <https://arcticdata.io/catalog/view/doi%3A10.18739.2020>.
- Google: Google Earth Pro, pp. Accessed 18 Jan 2023, [https://www.google.com/intl/en\\_uk/earth/desktop/](https://www.google.com/intl/en_uk/earth/desktop/), 2021.
- PAME: Compendium of Arctic Ship Accidents, pp. Accessed 30 May 2023, <https://www.pame.is/projects-new/arctic-shipping/pame-shipping-highlights/457-compendium-of-arctic-ship-accidents>, 2023.
